# Supplementary material
Source: PubMed Central journal article supplement (PMC27203)
Supplement: pnas_97_24_13203__1.pdf [file pnas_97_24_13203__1.pdf]

**Table 1.** Putative coiled-coil regions used in this study

| Construct* | Systematic Name | Yeast Proteome | Region used <sup>†</sup> | Dimer score <sup>‡</sup> | Interactions <sup>§</sup> |
|------------|-----------------|----------------|--------------------------|--------------------------|---------------------------|
| 1          | YFL008W         | SMC1           | 159–497 <sup>¶</sup>     | 0.99                     | A, B                      |
| 2          | YFL008W         | SMC1           | 688–929 <sup>¶</sup>     | 0.99                     | A, B                      |
| 3          | YFL008W         | SMC1           | 688–1076 <sup>¶</sup>    | 0.99                     | A, B                      |
| 4          | YDL181W         | INH1           | 37–84                    | 0.99                     | A, B                      |
| 5          | YHL010C         | YHL010C        | 477–560                  | 0.96                     | A                         |
| 6          | YKL179C         | YKL179C        | 44–113                   | 0.62                     |                           |
| 7          | YKL179C         | YKL179C        | 159–222                  | 0.63                     |                           |
| 8          | YKL179C         | YKL179C        | 217–354                  | 0.63                     | A                         |
| 9          | YKL179C         | YKL179C        | 382–455                  | 0.96                     |                           |
| 10         | YKL179C         | YKL179C        | 484–548                  | 0.60                     | A                         |
| 11         | YLR131C         | ACE2           | 171–253                  | 0.95                     | A                         |
| 12         | YDR499W         | YDR499W        | 76–152                   | 0.93                     |                           |
| 13         | YLL026W         | HSP104         | 447–519                  | 0.93                     |                           |
| 14         | YHL009C         | YAP3           | 144–220                  | 0.93                     |                           |
| 15         | YDR184C         | ATC1           | 235–293                  | 0.93                     |                           |
| 16         | YDL072C         | YDL072C        | 156–202                  | 0.92                     | B                         |
| 17         | YMR117C         | SPC24          | 24–136 <sup>¶</sup>      | 0.92                     | A                         |
| 18         | YMR117C         | SPC24          | 72–136                   | 0.92                     | A, B                      |
| 19         | YLR190W         | YLR190W        | 280–347                  | 0.92                     |                           |
| 20         | YLR190W         | YLR190W        | 342–400                  | 0.28                     | A, B                      |
| 21         | YCL029C         | BIK1           | 178–409 <sup>¶</sup>     | 0.92                     | B                         |
| 22         | YCL029C         | BIK1           | 346–409                  | 0.92                     |                           |
| 23         | YBR057C         | MUM2           | 169–236                  | 0.92                     |                           |
| 24         | YBR057C         | MUM2           | 233–294                  | 0.24                     | B                         |
| 25         | YBR057C         | MUM2           | 310–365                  | 0.31                     |                           |
| 26         | YKL050C         | YKL050C        | 481–547                  | 0.92                     | B                         |
| 27         | YKL023W         | YKL023W        | 143–228                  | 0.92                     |                           |
| 28         | YOL069W         | NUF2           | 124–449 <sup>¶</sup>     | 0.91                     | A, B                      |
| 29         | YCL024W         | YCL024W        | 520–583                  | 0.91                     |                           |
| 30         | YLR314C         | CDC3           | 427–516                  | 0.91                     | B                         |
| 31         | YJL036W         | SNX4           | 330–394                  | 0.90                     |                           |
| 32         | YOR195W         | SLK19          | 277–821 <sup>¶</sup>     | 0.90                     | A, B                      |
| 33         | YNL079C         | TPM1           | 1–198                    | 0.90                     | A                         |
| 34         | YIL138C         | TPM2           | 1–160                    | 0.90                     | A, B                      |
| 35         | YPL146C         | YPL146C        | 307–380                  | 0.90                     |                           |
| 36         | YLL021W         | SPA2           | 267–410                  | 0.89                     | B                         |
| 37         | YGR059W         | SPR3           | 439–505                  | 0.89                     | B                         |
| 38         | YLR429W         | CRN1           | 589–650                  | 0.89                     | A, B                      |
| 39         | YCR086W         | YCR086W        | 7–86                     | 0.88                     | B                         |
| 40         | YIR018W         | YAP5           | 61–148                   | 0.87                     | A                         |

|                 |         |         |                        |      |      |
|-----------------|---------|---------|------------------------|------|------|
| 41              | YHR158C | KEL1    | 770–1163 <sup>¶</sup>  | 0.87 | A, B |
| 42              | YHR158C | KEL1    | 959–1092               | 0.54 | B    |
| 43              | YHR158C | KEL1    | 770–971 <sup>¶</sup>   | 0.87 | A, B |
| 44              | YHR158C | KEL1    | 1078–1163 <sup>¶</sup> | 0.27 | A    |
| 45              | YLR319C | BUD6    | 584–641                | 0.86 |      |
| 46              | YMR124W | YMR124W | 480–546                | 0.85 |      |
| 47              | YMR124W | YMR124W | 803–863                | 0.48 | A, B |
| 48              | YDR379W | RGA2    | 606–686                | 0.85 | A, B |
| 49              | YGL086W | MAD1    | 61–333 <sup>¶</sup>    | 0.49 | A, B |
| 50              | YGL086W | MAD1    | 379–598 <sup>¶</sup>   | 0.85 |      |
| 51              | YJL114W | (TY4B)  | 30–125                 | 0.83 | A, B |
| 52              | YJL113W | (TY4A)  | 30–125                 | 0.83 | A, B |
| 53              | YDR200C | YDR200C | 444–547                | 0.83 |      |
| 54              | YDL074C | YDL074C | 118–183                | 0.44 |      |
| 55              | YDL074C | YDL074C | 118–635 <sup>¶</sup>   | 0.83 | A, B |
| 56              | YGL075C | MPS2    | 145–227                | 0.83 | A, B |
| 57              | YGL066W | YGL066W | 264–334                | 0.83 |      |
| 58              | YNL271C | BNI1    | 696–807                | 0.81 |      |
| 59              | YNL271C | BNI1    | 1517–1578              | 0.83 |      |
| 60              | YPR049C | YPR049C | 676–865 <sup>¶</sup>   | 0.83 |      |
| 61              | YNL272C | SEC2    | 11–178 <sup>¶</sup>    | 0.83 | A, B |
| 62              | YDL099W | YDL099W | 173–290                | 0.86 | A, B |
| 63              | YOR326W | MYO2    | 575–1101 <sup>¶</sup>  | 0.84 | B    |
| 64              | YOR326W | MYO2    | 575–1192 <sup>¶</sup>  | 0.84 |      |
| 65              | YLR238W | YLR238W | 354–419                | 0.46 |      |
| 66              | YIR017C | MET28   | 111–185                | 0.82 | B    |
| 67              | YGR285C | ZUO1    | 285–372                | 0.82 |      |
| 68 <sup>¶</sup> | YLR045C | STU2    | 681–775                | 0.81 |      |
| 69              | YFR031C | SMC2    | 159–398 <sup>¶</sup>   | 0.28 | A    |
| 70              | YFR031C | SMC2    | 774–958 <sup>¶</sup>   | 0.82 | A, B |
| 71              | YAL011W | YAL011W | 182–277                | 0.82 | B    |
| 72              | YAL035W | YAL035W | 73–251 <sup>¶</sup>    | 0.72 |      |
| 73              | YAL047C | SPC72   | 91–155                 | 0.20 | B    |
| 74              | YAL047C | SPC72   | 335–471 <sup>¶</sup>   | 0.10 | B    |
| 75              | YAL047C | SPC72   | 566–621                | 0.44 |      |
| 76              | YBL063W | KIP1    | 701–758                | 0.74 |      |
| 77              | YBR211C | AME1    | 189–248                | 0.76 | B    |
| 78              | YDL087C | LUC7    | 113–166                | 0.20 | A    |
| 79              | YDL126C | CDC48   | 750–800                | 0.05 |      |
| 80              | YDR150W | NUM1    | 103–303 <sup>¶</sup>   | 0.66 | A, B |
| 81              | YDR159W | SAC3    | 677–747                | 0.48 |      |
| 82              | YDR218C | SPR28   | 369–422                | 0.73 |      |
| 83              | YDR251W | PAM1    | 346–531 <sup>¶</sup>   | 0.79 |      |
| 84              | YDR285W | ZIP1    | 182–357 <sup>¶</sup>   | 0.79 | A    |
| 85              | YDR285W | ZIP1    | 388–761 <sup>¶</sup>   | 0.66 | A    |
| 86              | YDR295C | YDR295C | 439–655 <sup>¶</sup>   | 0.74 | A, B |

|     |         |         |                        |      |      |
|-----|---------|---------|------------------------|------|------|
| 87  | YDR356W | NUF1    | 135–803 <sup>¶</sup>   | 0.60 |      |
| 88  | YDR507C | GIN4    | 539–645                | 0.78 | A    |
| 89  | YEL043W | YEL043W | 214–392 <sup>¶</sup>   | 0.80 | A, B |
| 90  | YEL061C | CIN8    | 543–670                | 0.59 | A, B |
| 91  | YEL061C | CIN8    | 873–931                | 0.06 | A    |
| 92  | YER149C | PEA2    | 249–416 <sup>¶</sup>   | 0.76 | A, B |
| 93  | YGL216W | KIP3    | 431–482                | 0.04 |      |
| 94  | YGR089W | YGR089W | 762–936 <sup>¶</sup>   | 0.75 | A, B |
| 95  | YGR130C | YGR130C | 422–782 <sup>¶</sup>   | 0.74 | A    |
| 96  | YGR142W | BTN2    | 255–331                | 0.80 |      |
| 97  | YHR107C | CDC12   | 356–407                | 0.67 | A, B |
| 98  | YJL074C | SMC3    | 107–518 <sup>¶</sup>   | 0.50 | A, B |
| 99  | YJL074C | SMC3    | 751–1050 <sup>¶</sup>  | 0.75 | A, B |
| 100 | YJL187C | SWE1    | 289–339                | 0.10 |      |
| 101 | YJR035W | RAD26   | 75–146                 | 0.77 | A    |
| 102 | YJR076C | CDC11   | 348–414                | 0.31 | A    |
| 103 | YJR083C | YJR083C | 70–135                 | 0.78 | A, B |
| 104 | YJR112W | NNF1    | 59–187 <sup>¶</sup>    | 0.78 | A    |
| 105 | YJR112W | NNF1    | 113–187                | 0.78 | A    |
| 106 | YKL042W | SPC42   | 47–150                 | 0.81 | A, B |
| 107 | YKL113C | RAD27   | 80–138                 | 0.36 |      |
| 108 | YKR054C | DYN1    | 469–524                | 0.26 | A    |
| 109 | YKR054C | DYN1    | 3249–3318              | 0.20 | A, B |
| 110 | YKR054C | DYN1    | 3522–3620 <sup>¶</sup> | 0.63 | A, B |
| 111 | YLR045C | STU2    | 681–775                | 0.81 |      |
| 112 | YLR086W | SMC4    | 382–684 <sup>¶</sup>   | 0.80 | A, B |
| 113 | YLR086W | SMC4    | 834–1275 <sup>¶</sup>  | 0.69 | A    |
| 114 | YLR200W | YKE2    | 1–51                   | 0.77 |      |
| 115 | YLR200W | YKE2    | 55–113                 | 0.71 | B    |
| 116 | YLR200W | YKE2    | 1–113 <sup>¶</sup>     | 0.77 |      |
| 117 | YLR212C | TUB4    | 401–457                | 0.21 |      |
| 118 | YLR254C | YLR254C | 1–134                  | 0.73 | A    |
| 119 | YLR309C | IMH1    | 117–828 <sup>¶</sup>   | 0.77 |      |
| 120 | YLR454W | YLR454W | 1070–1128              | 0.30 | B    |
| 121 | YLR454W | YLR454W | 1878–1949              | 0.78 | B    |
| 122 | YML072C | YML072C | 924–985                | 0.77 |      |
| 123 | YMR029C | YMR029C | 14–82                  | 0.73 |      |
| 124 | YMR065W | KAR5    | 302–438 <sup>¶</sup>   | 0.16 | A    |
| 125 | YMR192W | YMR192W | 552–707 <sup>¶</sup>   | 0.75 | A    |
| 126 | YMR198W | CIK1    | 190–374 <sup>¶</sup>   | 0.72 | B    |
| 127 | YMR294W | JNM1    | 86–235 <sup>¶</sup>    | 0.26 |      |
| 128 | YNL084C | END3    | 277–349                | 0.72 | B    |
| 129 | YNL153C | GIM3    | 62–128                 | 0.73 | B    |
| 130 | YNL225C | CNM67   | 166–461 <sup>¶</sup>   | 0.73 |      |
| 131 | YNL250W | RAD50   | 200–538 <sup>¶</sup>   | 0.74 | B    |
| 132 | YNL250W | RAD50   | 730–1115 <sup>¶</sup>  | 0.74 | A, B |

|     |         |        |                      |      |      |
|-----|---------|--------|----------------------|------|------|
| 133 | YOL145C | CTR9   | 484–528              | 0.77 |      |
| 134 | YOR058C | ASE1   | 478–540              | 0.29 |      |
| 135 | YOR127W | RGA1   | 585–668              | 0.76 | A    |
| 136 | YOR269W | PAC1   | 74–140               | 0.78 | A, B |
| 137 | YPL018W | CTF19  | 27–100               | 0.78 | B    |
| 138 | YPL115C | BEM3   | 39–104               | 0.79 |      |
| 139 | YPL155C | KIP2   | 495–554              | 0.43 | A    |
| 140 | YPL155C | KIP2   | 495–702 <sup>¶</sup> | 0.43 | A, B |
| 141 | YPL242C | IQG1   | 741–810              | 0.78 |      |
| 142 | YPL255W | BBP1   | 309–368              | 0.15 |      |
| 143 | YPR141C | KAR3   | 84–384 <sup>¶</sup>  | 0.47 | A, B |
| 144 | YER016W | BIM1   | 161–229              | 0.33 |      |
| 145 | YGL093W | SPC105 | 583–714 <sup>¶</sup> | 0.12 | B    |
| 146 | YIL144W | TID3   | 361–690 <sup>¶</sup> | 0.69 | A, B |
| 147 | YIL144W | TID3   | 511–690 <sup>¶</sup> | 0.69 | A, B |
| 148 | YPL124W | NIP29  | 1–52                 | 0.44 | A    |
| 149 | YPL124W | NIP29  | 124–180              | 0.09 | A, B |
| 150 | YPL124W | NIP29  | 1–180 <sup>¶</sup>   | 0.44 | A, B |
| 151 | YER018C | SPC25  | 4–76                 | 0.01 | B    |
| 152 | YJR060W | CBF1   | 272–331              | 0.10 |      |
| 153 | YDR201W | SPC19  | 1–44                 | 0.23 |      |
| 154 | YDR201W | SPC19  | 61–164 <sup>¶</sup>  | 0.23 | B    |
| 155 | YDR201W | SPC19  | 1–164 <sup>¶</sup>   | 0.23 | A, B |
| 156 | YEL009C | GCN4   | 227–281              | 0.72 |      |
| 157 | YER111C | SWI4   | 856–927              | 0.23 |      |
| 158 | YER111C | SWI4   | 926–974              | 0.08 |      |
| 159 | YDR146C | SWI5   | 169–232              | 0.83 | A    |
| 160 | YLR182W | SWI6   | 553–645              | 0.68 |      |
| 161 | YOL004W | SIN3   | 468–517              | 0.08 |      |
| 162 | YOL004W | SIN3   | 892–922              | 0.01 |      |
| 163 | YNL103W | MET4   | 591–650              | 0.57 | A, B |

From the Yeast Proteome Database, Version 9.46A (1).

\*DNA corresponding to each putative coiled-coil region was subcloned into the pGAD-C1 and pGBDU-C1 vectors (2) to yield two plasmids denoted p(Construct)A and p(Construct)B, respectively (see *Materials and Methods*).

<sup>†</sup>Amino acid sequences encoded by two-hybrid plasmids used in this study. Primers were chosen using **primer3** (see *Materials and Methods*) to lie within a region corresponding to up to 42 nucleotides adjacent to the ends of the predicted coiled coil and up to 20 nucleotides into the predicted coiled-coil sequence.

<sup>‡</sup>Coiled-coil scores for the regions denoted at left were calculated using the program MULTICOIL (3).

<sup>§</sup>Activation-domain fusion constructs that interact in the two-hybrid assay are denoted A. DNA-binding-domain constructs that interact are denoted B.

<sup>¶</sup> Denotes a region predicted to contain multiple coiled coils.

<sup>||</sup>Construct 68 is identical to 111.

## References

1. Costanzo, M. C., Hogan, J. D., Cusick, M. E., Davis, B. P., Fancher, A. M., Hodges, P. E., Kondu, P., Lengieza, C., Lew-Smith, J. E., Lingner, C., *et al.* (2000) *Nucleic Acids Res.* **28**, 73–76.
2. James, P., Halladay, J. & Craig, E. A. (1996) *Genetics* **144**, 1425–1436.
3. Wolf, E., Kim, P. S. & Berger, B. (1997) *Protein Sci.* **6**, 1179–1189.
