# Supplementary material
Source: PubMed Central journal article supplement (PMC27203)
Supplement: pnas_97_24_13203__2.pdf [file pnas_97_24_13203__2.pdf]

**Table 2.** Two-hybrid interactions between putative coiled coils

| pGAD | pGBDU |       |       |       |       |       |       |       |       |
|------|-------|-------|-------|-------|-------|-------|-------|-------|-------|
| 1    | 3 C   | 28 D  | 39 A  | 70 D  | 128 D |       |       |       |       |
| 2    | 1 C   | 2 A   | 3 A   | 66 A  | 70 A  | 94 B  | 106 A | 109 A | 143 A |
| 3    | 1 B   | 2 B   | 3 B   | 70 B  | 106 C | 109 C | 143 B |       |       |
| 4    | 36 B  | 71 D  | 94 A  | 110 A | 131 B |       |       |       |       |
| 5    | 94 C  |       |       |       |       |       |       |       |       |
| 8    | 155 B |       |       |       |       |       |       |       |       |
| 10   | 155 D |       |       |       |       |       |       |       |       |
| 11   | 86 C  |       |       |       |       |       |       |       |       |
| 17   | 18 C  | 20 D  | 56 A  | 97 C  |       |       |       |       |       |
| 18   | 1 B   | 20 A  | 56 A  | 86 A  | 97 A  | 109 B | 131 C | 151 B |       |
| 20   | 18 B  |       |       |       |       |       |       |       |       |
| 28   | 1 D   | 86 B  | 98 C  |       |       |       |       |       |       |
| 32   | 32 C  | 70 B  |       |       |       |       |       |       |       |
| 33   | 16 D  |       |       |       |       |       |       |       |       |
| 34   | 34 B  |       |       |       |       |       |       |       |       |
| 38   | 38 A  | 74 D  |       |       |       |       |       |       |       |
| 40   | 71 B  |       |       |       |       |       |       |       |       |
| 41   | 41 A  | 43 B  | 109 A | 128 C | 136 D |       |       |       |       |
| 43   | 41 C  | 43 C  | 109 A |       |       |       |       |       |       |
| 44   | 71 C  | 74 C  |       |       |       |       |       |       |       |
| 47   | 92 B  | 98 D  |       |       |       |       |       |       |       |
| 48   | 48 A  |       |       |       |       |       |       |       |       |
| 49   | 1 B   | 49 A  | 86 B  | 151 B |       |       |       |       |       |
| 51   | 51 A  | 52 A  | 74 C  | 98 B  |       |       |       |       |       |
| 52   | 51 A  | 52 A  | 74 B  | 98 B  |       |       |       |       |       |
| 55   | 1 B   | 28 A  | 32 B  | 55 A  | 70 A  | 86 A  | 89 B  | 98 D  | 129 A |
| 56   | 18 B  |       |       |       |       |       |       |       |       |
| 61   | 61 A  | 163 D |       |       |       |       |       |       |       |
| 62   | 26 D  | 62 A  |       |       |       |       |       |       |       |
| 69   | 149 A |       |       |       |       |       |       |       |       |
| 70   | 149 C |       |       |       |       |       |       |       |       |
| 78   | 98 D  |       |       |       |       |       |       |       |       |
| 80   | 28 A  | 86 C  | 94 B  | 98 A  | 155 C |       |       |       |       |



|     |  |      |      |       |       |
|-----|--|------|------|-------|-------|
| 159 |  | 94 A |      |       |       |
| 163 |  | 66 B | 61 A | 128 B | 163 B |

---

A, growth observed between 0 and 4 days; B, 5–8 days; C, 9–12 days; D, 13–16 days; E, >16 days.
